# Supplementary material for: An in situ growth route towards anti-perovskite Ni3InN nanoparticles embedded within amorphous silicon nitride
Source: Royal Society of Chemistry journal article supplement (doi:10.1039/d3ta06212k), 2023-12-28
Supplement: d3ta06212k1.pdf [file d3ta06212k1.pdf]

1 **Supporting Information**

2 **An *in situ* growth route towards anti-perovskite Ni<sub>3</sub>InN nanoparticles embedded within**  
3 **amorphous silicon nitride**

4  
5 Shotaro Tada,<sup>a, d</sup> Sakurako Takazawa,<sup>a</sup> Norifumi Asakuma,<sup>a</sup> Maxime Cheype,<sup>b</sup> Sawao Honda,<sup>a</sup>  
6 Ravi Kumar<sup>c</sup>, Samuel Bernard,<sup>b</sup> and Yuji Iwamoto<sup>\*a</sup>

7  
8 a. Department of Life Science and Applied Chemistry, Graduate School of Engineering,  
9 Nagoya Institute of Technology, Gokiso-cho, Showa-ku, Nagoya 466-8555, Japan

10 b. University of Limoges, CNRS, IRCER, UMR 7315, F-87000, Limoges, France

11 c. Laboratory for High Performance Ceramics, Department of Metallurgical and Materials  
12 Engineering, Indian Institute of Technology Madras (IIT Madras), Chennai 600036, India

13 d. Department of Metallurgical and Materials Engineering, Indian Institute of Technology  
14 Madras (IIT Madras), Chennai 600036, India

15  
16 \* Corresponding author: Yuji Iwamoto

17 E-mail: iwamoto.yuji@nitech.ac.jp

18 Tel/Fax: +81-52-735-5276

19

20 **Keywords**

21 **Anti-perovskite, Ni<sub>3</sub>InN, amorphous silicon nitride, polymer-derived ceramics (PDCs)**

22

23

24

25

26

## 27 1. Synthesis of Ni<sub>0.1</sub>In<sub>0.1</sub>-PH sample

28 The handling of the chemicals and reagents was performed under an inert atmosphere of  
29 pure argon (Ar) using standard Schlenk techniques and vacuum/Ar lines. Commercially  
30 available perhydropolysilazane (PHPS, NN120-20, 20 wt% in dibutyl ether solution) was  
31 provided by Sanwa Kagaku, Corp., Shizuoka, Japan. The dibutyl ether was substituted by  
32 super-anhydrous toluene (99.5 % purity, Wako Pure Chemical Industries, Ltd., Osaka, Japan)  
33 to be 20 wt% for the PHPS contents.

34 In a typical experiment for Ni<sub>0.1</sub>In<sub>0.1</sub>-PH sample, a 100 mL two-neck round-bottom flask  
35 equipped with a magnetic stirrer was charged with the solvent-substituted PHPS (10 mL, 44  
36 mmol, 20 wt% in toluene) and toluene (30 mL), then NiCl<sub>2</sub> (0.59 g, 4.4 mmol, Ni/Si = 0.1) and  
37 InCl<sub>3</sub> (0.98 g, 4.4 mmol, In/Si = 0.1) were added to the solution at room temperature. The  
38 reaction mixture was vigorously stirred at R.T. for 30 min and subsequently refluxed at 110 °C  
39 for 15 h under flowing Ar with maintaining vigorous stirring. After the reaction mixture was  
40 cooled to room temperature, the toluene solvent was removed under vacuum at 60 °C to give  
41 a Ni<sub>0.1</sub>In<sub>0.1</sub>-PH sample.

42

## 43 2. Supporting data

44

45 **Scheme S1** Dehydrogenation reaction of Si-H/N-H in PSZ catalyzed by NiCl<sub>2</sub> and possible  
46 Ni(II) coordination structures such as 4-coordinate Ni(II) complex.

47

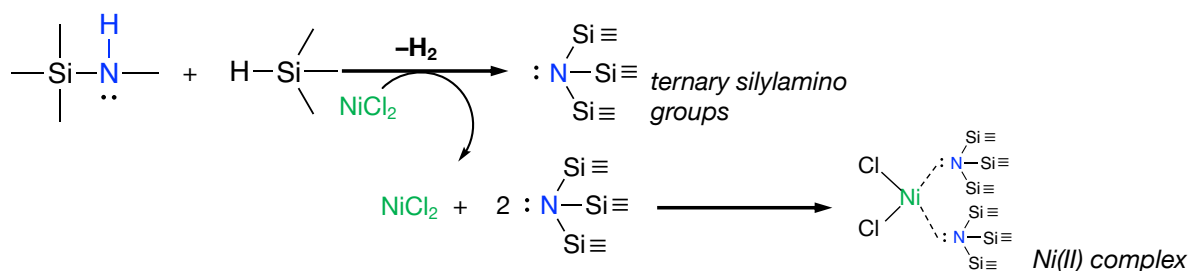

59 **Table S1** The selected absorption bands position, band shift and relative intensity to  $\nu\text{Si-N-Si}$   
 60 ( $I_{\text{band}}/I_{\text{Si-N-Si}}$ ) in the ATR-FTIR spectra for  $\text{Ni}_x\text{In}_{0.1}\text{-DRZ}$  samples.

| Band                          | Sample                                    | Wavenumber<br>/cm <sup>-1</sup> | Band shift<br>/cm <sup>-1</sup> | Relative intensity<br>( $I_{\text{band}} / I_{\text{Si-N-Si}}$ ) |
|-------------------------------|-------------------------------------------|---------------------------------|---------------------------------|------------------------------------------------------------------|
| $\nu(\text{Si-N-Si})$         | Durazane <sup>®</sup> 1800                | 881.3                           | -                               | 1                                                                |
|                               | In <sub>0.1</sub> -DRZ                    | 876.5                           | -4.82                           | 1                                                                |
|                               | Ni <sub>0.05</sub> In <sub>0.1</sub> -DRZ | 880.4                           | -0.96                           | 1                                                                |
|                               | Ni <sub>0.1</sub> In <sub>0.1</sub> -DRZ  | 881.3                           | 0                               | 1                                                                |
| $\nu(\text{N-H})$             | Durazane <sup>®</sup> 1800                | 3378.7                          | -                               | 0.237                                                            |
|                               | In <sub>0.1</sub> -DRZ                    | 3400.9                          | 22.2                            | 0.157                                                            |
|                               | Ni <sub>0.05</sub> In <sub>0.1</sub> -DRZ | 3398.0                          | 19.3                            | 0.092                                                            |
|                               | Ni <sub>0.1</sub> In <sub>0.1</sub> -DRZ  | 3398.9                          | 20.2                            | 0.091                                                            |
| $\rho(\text{Si}_2\text{N-H})$ | Durazane <sup>®</sup> 1800                | 1160.9                          | -                               | 0.508                                                            |
|                               | In <sub>0.1</sub> -DRZ                    | 1133.0                          | -27.9                           | 0.244                                                            |
|                               | Ni <sub>0.05</sub> In <sub>0.1</sub> -DRZ | 1140.7                          | -20.2                           | 0.158                                                            |
|                               | Ni <sub>0.1</sub> In <sub>0.1</sub> -DRZ  | 1133.0                          | -27.9                           | 0.133                                                            |
| $\nu(\text{Si-H})$            | Durazane <sup>®</sup> 1800                | 2121.3                          | -                               | 0.241                                                            |
|                               | In <sub>0.1</sub> -DRZ                    | 2123.2                          | 1.9                             | 0.163                                                            |
|                               | Ni <sub>0.05</sub> In <sub>0.1</sub> -DRZ | 2128.1                          | 6.8                             | 0.102                                                            |
|                               | Ni <sub>0.1</sub> In <sub>0.1</sub> -DRZ  | 2130.0                          | 8.7                             | 0.068                                                            |
| $\delta(\text{Si-CH}_3)$      | Durazane <sup>®</sup> 1800                | 1253.5                          | -                               | 0.278                                                            |
|                               | In <sub>0.1</sub> -DRZ                    | 1254.5                          | 1                               | 0.329                                                            |
|                               | Ni <sub>0.05</sub> In <sub>0.1</sub> -DRZ | 1256.4                          | 2.9                             | 0.321                                                            |
|                               | Ni <sub>0.1</sub> In <sub>0.1</sub> -DRZ  | 1259.3                          | 5.8                             | 0.354                                                            |
| $\delta(\text{C-H, Vinyl})$   | Durazane <sup>®</sup> 1800                | 1403.9                          | -                               | 0.058                                                            |
|                               | In <sub>0.1</sub> -DRZ                    | 1403.0                          | -0.9                            | 0.109                                                            |
|                               | Ni <sub>0.05</sub> In <sub>0.1</sub> -DRZ | 1403.0                          | -0.9                            | 0.087                                                            |
|                               | Ni <sub>0.1</sub> In <sub>0.1</sub> -DRZ  | 1403.0                          | -0.9                            | 0.120                                                            |

61  
 62  
 63  
 64  
 65  
 66  
 67  
 68  
 69  
 70  
 71  
 72  
 73  
 74

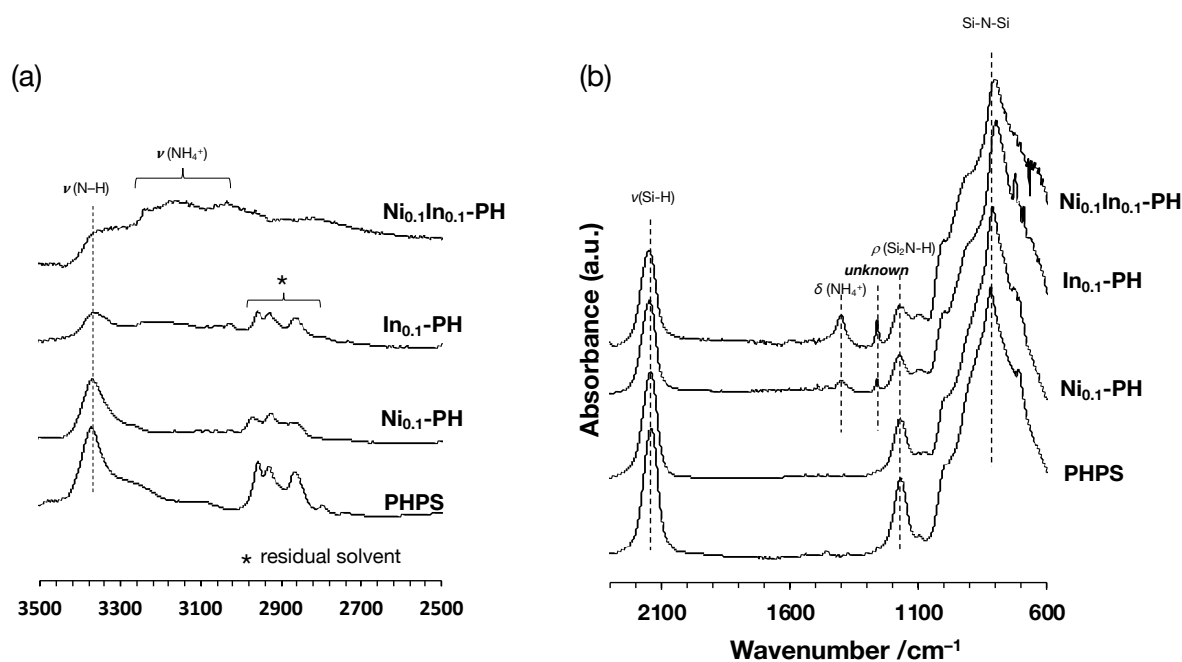

76

77

78 **Fig. S1** ATR-FTIR spectra of as-synthesized Ni<sub>x</sub>In<sub>y</sub>-PH samples in the range of (a) 3500–2500  
 79 cm<sup>-1</sup> and (b) 2300–600 cm<sup>-1</sup>.

80

### 81 [FTIR analysis]

82 As reference spectra, as-received PHPS was recorded. FTIR (ATR /cm<sup>-1</sup>): 3373 (νN-H),  
 83 2143 (νSi-H), 1172 (ρSi<sub>2</sub>N-H) and 822 (νSi-N-Si) [1-5]. The νSi-N-Si stretching bands for  
 84 NiCl<sub>2</sub> and InCl<sub>3</sub>-*co*-modified PHPS samples indicated all lower wavenumber (WN) values than  
 85 those for as-received PHPS sample. The absorption band shift of the νSi-N-Si on Ni<sub>0.1</sub>-PH,  
 86 In<sub>0.1</sub>-PH, and Ni<sub>0.1</sub>In<sub>0.1</sub>-PH samples were measured to be -7.7, -22.2, and -20.3 cm<sup>-1</sup>,  
 87 respectively. It was found that the extent of band shift is greater in In<sub>0.1</sub>-PH and Ni<sub>0.1</sub>In<sub>0.1</sub>-PH  
 88 samples compared to the Ni<sub>0.1</sub>-PH sample. In addition, the chemical modification of PHPS  
 89 with NiCl<sub>2</sub> and InCl<sub>3</sub> resulted in a reduction of the relative intensity on both ρSi<sub>2</sub>N-H and νSi-  
 90 H bands. The extent of decreased intensities of both ρSi<sub>2</sub>N-H and νSi-H was greater for In<sub>0.1</sub>-  
 91 PH and Ni<sub>0.1</sub>In<sub>0.1</sub>-PH samples compared to Ni<sub>0.1</sub>-PH sample. The νSi-H stretching band varies  
 92 toward higher WN values in the range 2142–2152 cm<sup>-1</sup>. The vibrational frequency of the νSi-  
 93 H increases either through the electronegativity (*X*) of the substituting group increases [6] or  
 94 through the increase of nitrogen concentration within the precursors [7], *i.e.*, the substitution  
 95 of H atoms (*X* = 2.2 by Pauling scale) with N atoms (*X* = 3.0 by Pauling scale) on Si atoms  
 96 back bonded to Si-H bonds. The substitution leads to the νSi-H stretching mode toward higher

97 frequency due to the induction effect. This result is consistent with the formation of the ternary  
98 silylamino group during reflux at 110 °C. Additionally, new absorption bands appeared on  
99 **In<sub>0.1</sub>-PH** and **Ni<sub>0.1</sub>In<sub>0.1</sub>-PH** samples (**Fig. S1a**) at 3240, 3150, and 1404 cm<sup>-1</sup>, which are  
100 assigned to ammonium salt, most probably ammonium chloride (NH<sub>4</sub>Cl) [8].

101

102 Reference:

- 103 1. O. Funayama, T. Kato, Y. Tashiro and T. Isoda, Synthesis of a Polyborosilazane and Its  
104 Conversion into Inorganic Compounds, *J. Am. Ceram. Soc.*, 1993, **76**, 717–723.
- 105 2. O. Funayama, Y. Tashiro, T. Aoki and T. Isoda, Synthesis and pyrolysis of  
106 polyaluminosilazane, *Nippon Seramikkusu Kyokai Gakujutsu Ronbunshi/Journal Ceram.*  
107 *Soc. Japan*, 1994, **102**, 908–912.
- 108 3. Y. Iwamoto, K. Kikuta and S. Hirano, Microstructural development of Si<sub>3</sub>N<sub>4</sub>–SiC–Y<sub>2</sub>O<sub>3</sub>  
109 ceramics derived from polymeric precursors, *J. Mater. Res.*, 1998, **13**, 353–361.
- 110 4. Y. Iwamoto, K. Kikuta and S. Hirano, Si<sub>3</sub>N<sub>4</sub>–SiC–Y<sub>2</sub>O<sub>3</sub> ceramics derived from yttrium-  
111 modified block copolymer of perhydropolysilazane and hydroxy-polycarbosilane, *J. Mater.*  
112 *Res.*, 1999, **14**, 1886–1895.
- 113 5. Y. Iwamoto, K. Kikuta and S. Hirano, Si<sub>3</sub>N<sub>4</sub>–TiN–Y<sub>2</sub>O<sub>3</sub> ceramics derived from chemically  
114 modified perhydropolysilazane, *J. Mater. Res.*, 1999, **14**, 4294–4301.
- 115 6. G. Lucovsky, R. J. Nemanich and J. C. Knights, Structural interpretation of the vibrational  
116 spectra of a-Si: H alloys, *Phys. Rev. B*, 1979, **19**, 2064–2073.
- 117 7. I. V. Afanasyev-Charkin, L. G. Jacobsohn, R. D. Averitt and M. Nastasi, Amorphous silicon  
118 nitride films of different composition deposited at room temperature by pulsed glow  
119 discharge plasma immersion ion implantation and deposition, *J. Vac. Sci. Technol. A*  
120 *Vacuum, Surfaces, Film.*, 2004, **22**, 2342–2346.
- 121 8. Q. Qu, L. Li, W. Bai, C. Yan and C. N. Cao, Effects of NaCl and NH<sub>4</sub>Cl on the initial  
122 atmospheric corrosion of zinc, *Corros. Sci.*, 2005, **47**, 2832–2840.

123

124

125

126

127

128

129

130

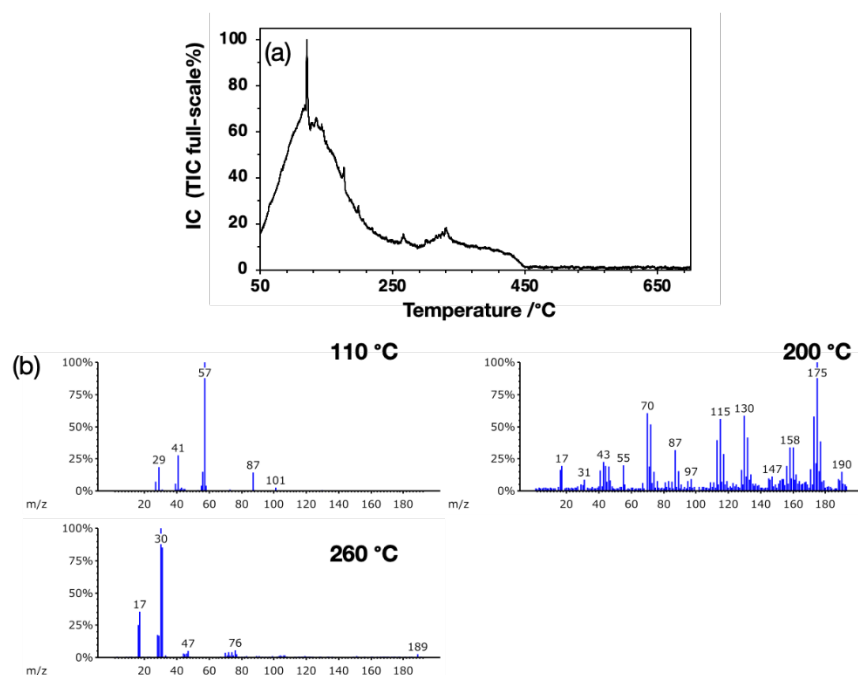

132 **Fig. S2** TG-MS analysis of PHPS: (a) The total ion current (TIC) chromatogram and (b) mass  
 133 fragments at selected temperatures.

134

135

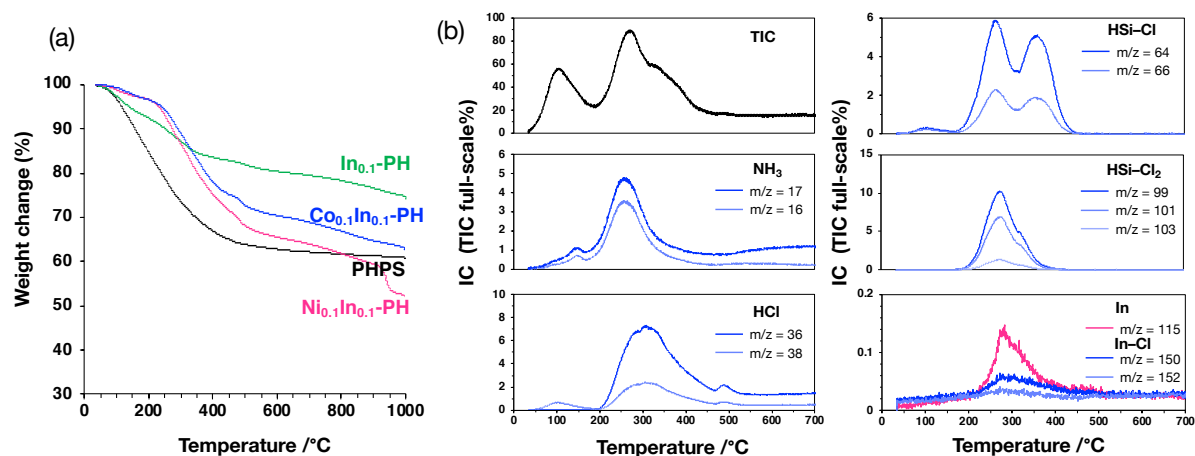

136

137

138 **Fig. S3** (a) TG-curves of starting PHPS and as-synthesized  $\text{M}_x\text{In}_{0.1}\text{-PH}$  samples (M = Ni and  
 139 Co, x = 0 or 0.1) to 1000 °C under He and (b) the total ion current (TIC) chromatogram and  
 140 selected mass fragments measured for  $\text{Ni}_{0.1}\text{In}_{0.1}\text{-PH}$  sample during TG-MS analysis.

141

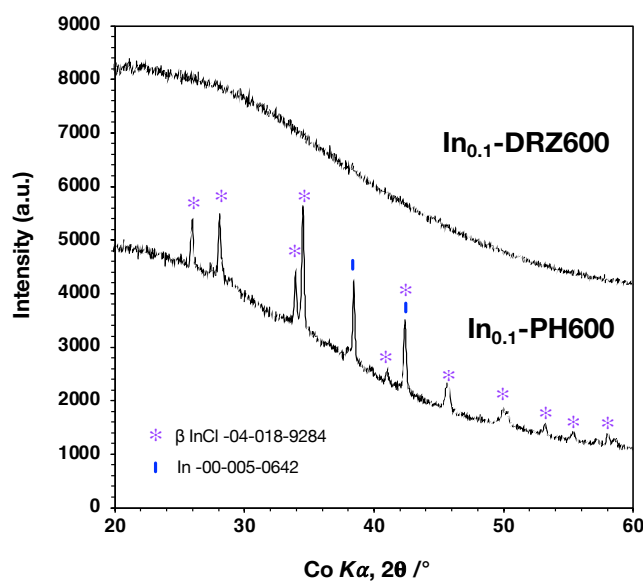

142

143 **Fig. S4** XRD patterns of (a) **In<sub>0.1</sub>-PH600** and (b) **In<sub>0.1</sub>-DRZ600** samples

144

145

146 **[TG-MS analysis]**

147 The TG-curve of as-received PHPS (**Fig. S3a**) displays a weight loss at 50–550 °C,  
 148 resulting in a final ceramic yield of 60.9 %. According to the MS analyses of as-received PHPS  
 149 (**Fig. S3b**), these weight losses are due to the volatilization of residual solvents such as dibutyl  
 150 ether (mass spectra measured at 110 °C,  $m/z = 57, 41, 29$ ), low molecular weight organosilicon  
 151 compounds such as  $\equiv\text{Si}-\text{NH}-$  (mass spectra measured at 200 °C,  $m/z = 43$ ) and  $\text{NH}_3$  ( $m/z =$   
 152  $17$ ), which are associated with cross-linking reactions of the precursor through trans-amination,  
 153 and bond redistribution reactions.

154 The **Ni<sub>0.1</sub>In<sub>0.1</sub>-PH** and **Co<sub>0.1</sub>In<sub>0.1</sub>-PH** samples showed similar behavior of weight loss (**Fig.**  
 155 **S3a**). The weight loss at 50-300 °C was significantly suppressed compared to the as-received  
 156 PHPS. As discussed in the FTIR results (**Fig. S1**), the catalytic cross-linking reaction of the  
 157 PSZ network during polymer synthesis through the dehydrocoupling reaction of Si-H/N-H  
 158 catalyzed by  $\text{MCl}_2$  helps to suppress the weight loss in this temperature range. In contrast to  
 159 **M<sub>0.1</sub>In<sub>0.1</sub>-PH** samples, the **In<sub>0.1</sub>-PH** sample showed less pronounced weight loss suppression  
 160 in this temperature range, possibly due to either the quantitative dependence or the participation  
 161 of a different reaction—*i.e.*, acid-base reaction—for **In<sub>0.1</sub>-PH** sample.

162 The weight loss from 330 °C to 500 °C is greater in **Ni<sub>0.1</sub>In<sub>0.1</sub>-PH** and **Co<sub>0.1</sub>In<sub>0.1</sub>-PH**  
 163 samples, indicating the volatilization of  $\text{InCl}_3$  which usually starts at 330 °C under an inert  
 164 atmosphere [1]. There was no significant difference in the weight loss of **Ni<sub>0.1</sub>In<sub>0.1</sub>-PH** and  
 165 **Co<sub>0.1</sub>In<sub>0.1</sub>-PH** samples, with the difference being within about 5% at 550 °C; however, the Co

166 species showed a smaller weight loss. In contrast, the **In<sub>0.1</sub>-PH** sample showed a featureless  
 167 slope in this temperature range, suggesting that the in situ formation of In–N bond via acid-  
 168 base reaction during synthesis reduced the amount of unreacted InCl<sub>3</sub> which evaporated at  
 169 around 330 °C. Weight loss from 550 °C is not observed in as-received PHPS but is observed  
 170 in **In<sub>0.1</sub>-PH**, **Ni<sub>0.1</sub>In<sub>0.1</sub>-PH** and **Co<sub>0.1</sub>In<sub>0.1</sub>-PH** samples suggesting that the decomposition of the  
 171 in situ formed In-N bonds occurred over 550 °C under an inert atmosphere [2].

172

173

174 Reference:

175 1. C. Karakaya, S. Ricote, D. Albin, E. Sánchez-Cortezón, B. Linares-Zea and R. J. Kee,  
 176 Thermogravimetric analysis of InCl<sub>3</sub> sublimation at atmospheric pressure, *Thermochim.*  
 177 *Acta*, 2015, **622**, 55–63.

178 2. Q. Guo, O. Kato and A. Yoshida, Thermal stability of indium nitride single crystal films, *J.*  
 179 *Appl. Phys.*, 1993, **73**, 7969–7971.

180

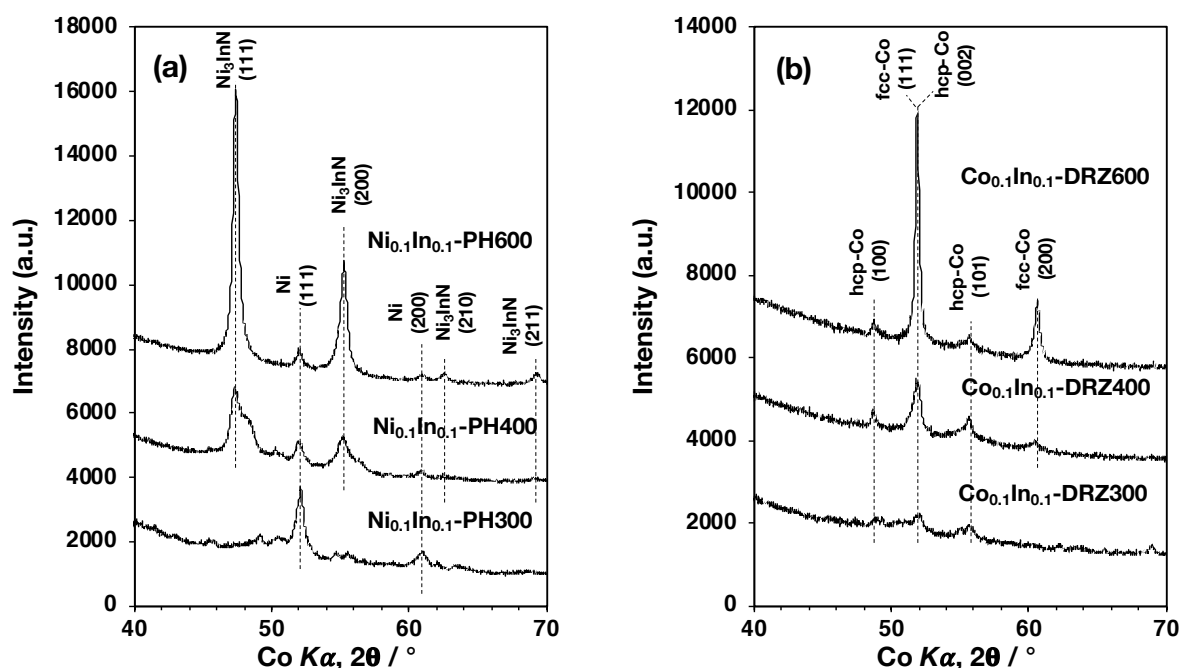

181

182 **Fig. S5** XRD patterns of (a) **Ni<sub>0.1</sub>In<sub>0.1</sub>-PHT** and (b) **Co<sub>0.1</sub>In<sub>0.1</sub>-DRZT** samples, *T* is pyrolysis  
 183 temperatures (300, 400, and 600 °C).

184

185

186

187

188



189

190 **Table S2** Chemical composition of as-pyrolyzed  $\text{Ni}_{0.1}\text{In}_{0.1}\text{-PHT}$  samples ( $T = 300, 400,$  and  
 191 600)

| Name                                          | Composition (wt%) |      |       |      |       |      |      | Atomic ratio normalized on Si                                                               |
|-----------------------------------------------|-------------------|------|-------|------|-------|------|------|---------------------------------------------------------------------------------------------|
|                                               | Si                | C    | N     | O    | Ni    | In   | Cl   |                                                                                             |
| $\text{Ni}_{0.1}\text{In}_{0.1}\text{-PH300}$ | 44.26             | 0.51 | 25.52 | 3.03 | 11.23 | 9.20 | 6.26 | $\text{Si}_1\text{N}_{1.16}\text{O}_{0.12}\text{Ni}_{0.12}\text{In}_{0.05}\text{Cl}_{0.11}$ |
| $\text{Ni}_{0.1}\text{In}_{0.1}\text{-PH400}$ | 45.44             | 0.43 | 27.96 | 2.76 | 10.79 | 7.26 | 5.36 | $\text{Si}_1\text{N}_{1.23}\text{O}_{0.11}\text{Ni}_{0.11}\text{In}_{0.04}\text{Cl}_{0.09}$ |
| $\text{Ni}_{0.1}\text{In}_{0.1}\text{-PH600}$ | 40.55             | 0.38 | 31.80 | 4.21 | 12.41 | 6.98 | 3.67 | $\text{Si}_1\text{N}_{1.57}\text{O}_{0.18}\text{Ni}_{0.15}\text{In}_{0.04}\text{Cl}_{0.07}$ |

192

193

194 **Table S3** Chemical composition of as-pyrolyzed  $\text{Co}_{0.1}\text{In}_{0.1}\text{-DRZT}$  samples ( $T = 300, 400,$  and  
 195 600)

| Name                                           | Composition (wt%) |      |       |      |       |       |      | Atomic ratio normalized on Si                                                                               |
|------------------------------------------------|-------------------|------|-------|------|-------|-------|------|-------------------------------------------------------------------------------------------------------------|
|                                                | Si                | C    | N     | O    | Co    | In    | Cl   |                                                                                                             |
| $\text{Co}_{0.1}\text{In}_{0.1}\text{-DRZ300}$ | 37.65             | 4.94 | 21.88 | 3.35 | 9.43  | 13.72 | 9.04 | $\text{Si}_1\text{Co}_{0.31}\text{N}_{1.17}\text{O}_{0.16}\text{Co}_{0.12}\text{In}_{0.09}\text{Cl}_{0.19}$ |
| $\text{Co}_{0.1}\text{In}_{0.1}\text{-DRZ400}$ | 33.43             | 0.68 | 29.25 | 7.88 | 9.44  | 10.29 | 9.03 | $\text{Si}_1\text{Co}_{0.05}\text{N}_{1.75}\text{O}_{0.41}\text{Co}_{0.13}\text{In}_{0.08}\text{Cl}_{0.21}$ |
| $\text{Co}_{0.1}\text{In}_{0.1}\text{-DRZ600}$ | 43.76             | 0.39 | 31.79 | 4.25 | 16.78 | 0.13  | 2.89 | $\text{Si}_1\text{Co}_{0.02}\text{N}_{1.46}\text{O}_{0.17}\text{Co}_{0.18}\text{In}_{0.00}\text{Cl}_{0.05}$ |

196

197

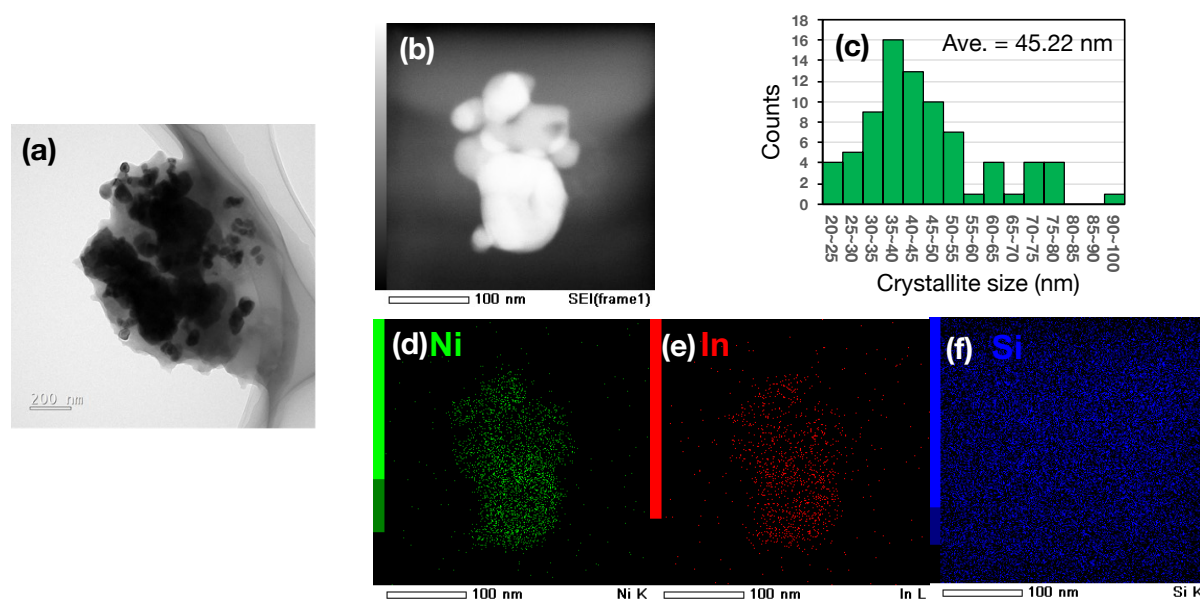

198

199

200 **Fig. S6** (a) BF-TEM image and (b) HAADF-STEM image of the  $\text{Ni}_{0.05}\text{In}_{0.1}\text{-DRZ600}$  sample.  
 201 (c) the  $\text{Ni}_3\text{InN}$  crystallite size distribution, and the result of STEM-EDS mapping of (d) Ni,  
 202 In and (f) Si.

203

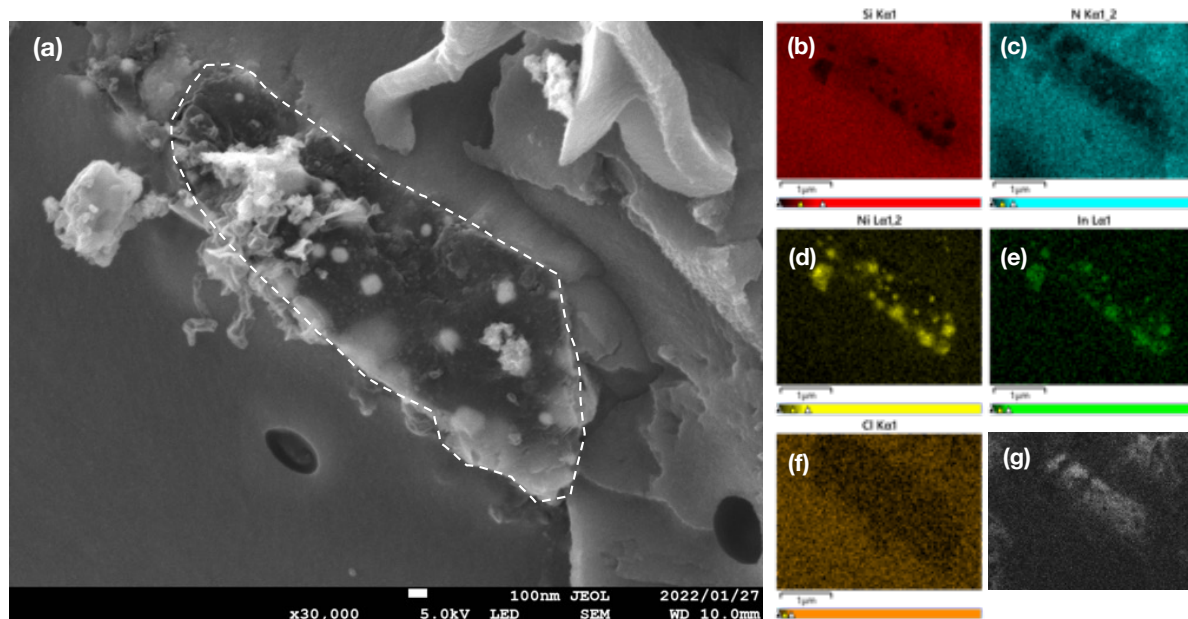

204  
 205  
 206  
 207  
 208  
 209  
 210  
 211

**Fig. S7** SEM-EDS and SEM-CL image analysis for the  $\text{Ni}_{0.1}\text{In}_{0.1}\text{-PH600}$  sample: (a) SEM image, and the results of EDS mapping of (b) Si, (c) N, (d) Ni, (e) In, and (f) Cl. (g) the SEM-CL image of the selected area around the nanoparticles. The white dashed line represents the monolithic region of a-SiN matrix.

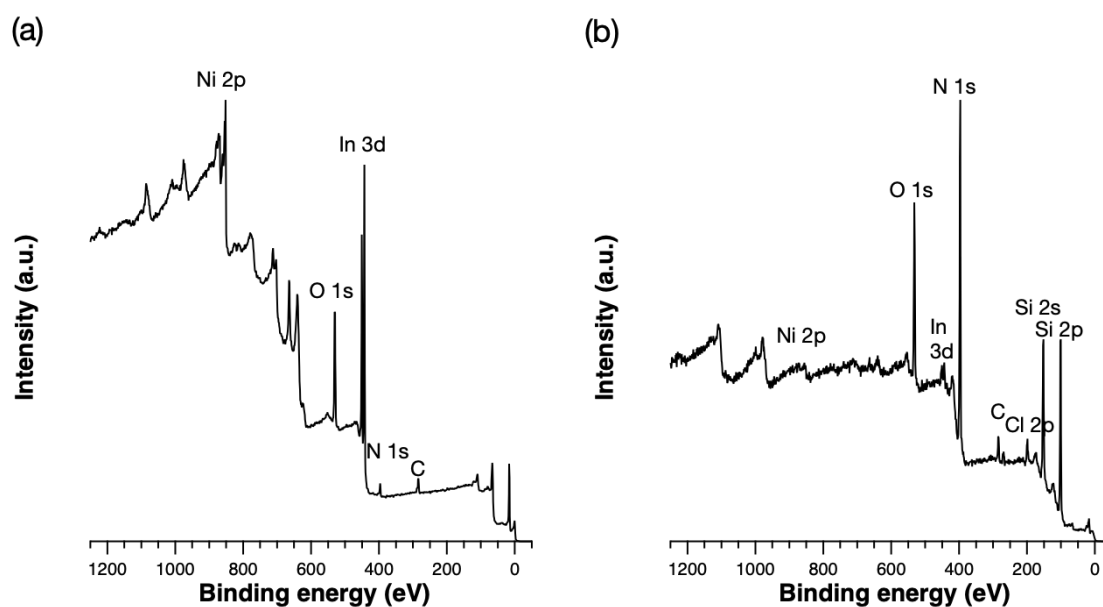

212  
 213  
 214  
 215

**Fig. S8** XPS survey scan spectra for (a) bulk  $\text{Ni}_3\text{InN}$  and (b)  $\text{Ni}_3\text{InN/SiN}$  nanocomposite ( $\text{Ni}_{0.1}\text{In}_{0.1}\text{-PH600}$  sample)

216  
217

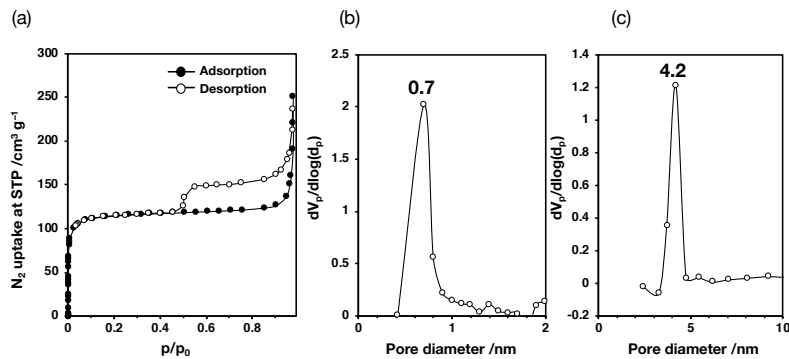

218  
219 **Fig. S9** (a) N<sub>2</sub> adsorption and desorption isotherms at -196 °C for Ni<sub>0.05</sub>In<sub>0.1</sub>-DRZ600 sample,  
220 and the resulting pore size distribution curve characterized by the (b) MP plot and (c) BJH plot.  
221

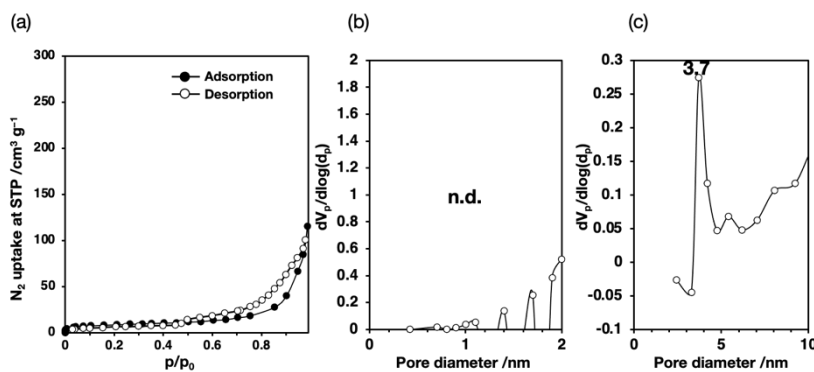

222 **Fig. S10** (a) N<sub>2</sub> adsorption and desorption isotherms at -196 °C for Ni<sub>0.1</sub>In<sub>0.1</sub>-PH600 sample,  
223 and the resulting pore size distribution curve characterized by the (b) MP plot and (c) BJH plot.  
224

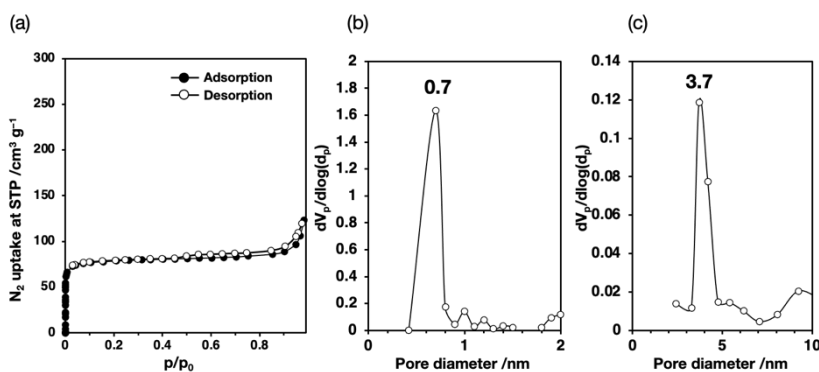

225 **Fig. S11** (a) N<sub>2</sub> adsorption and desorption isotherms at -196 °C for Ni<sub>0.1</sub>In<sub>0.1</sub>-DRZ600 sample,  
226 and the resulting pore size distribution curve characterized by the (b) MP and (c) BJH plot.

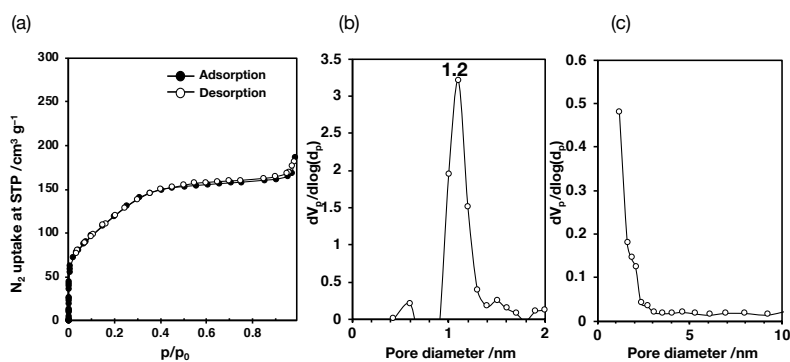

228 **Fig. S12** (a) N<sub>2</sub> adsorption and desorption isotherms at  $-196$  °C for **In<sub>0.1</sub>-DRZ600**, and the  
 229 resulting pore size distribution curve characterized by the (b) MP and (c) BJH plot.

230

231

232 **Table S4** The Brunauer–Emmett–Teller (BET) surface areas and pore volumes of pyrolyzed  
 233 samples.

| <b>Samples</b>                                  | <b>S<sub>BET</sub></b><br><b>/m<sup>2</sup> g<sup>-1</sup></b> | <b>V<sub>BET, total</sub></b><br><b>/cm<sup>3</sup> g<sup>-1</sup></b> | <b>V<sub>micro</sub></b><br><b>/cm<sup>3</sup> g<sup>-1</sup></b> | <b>V<sub>meso</sub></b><br><b>/cm<sup>3</sup> g<sup>-1</sup></b> |
|-------------------------------------------------|----------------------------------------------------------------|------------------------------------------------------------------------|-------------------------------------------------------------------|------------------------------------------------------------------|
| <b>Ni<sub>0.1</sub>In<sub>0.1</sub>-PH600</b>   | 32                                                             | 0.18                                                                   | n.d.                                                              | 0.17                                                             |
| <b>Ni<sub>0.05</sub>In<sub>0.1</sub>-DRZ600</b> | 460                                                            | 0.39                                                                   | 0.19                                                              | 0.18                                                             |
| <b>Ni<sub>0.1</sub>In<sub>0.1</sub>-DRZ600</b>  | 315                                                            | 0.19                                                                   | 0.13                                                              | 0.08                                                             |
| <b>In<sub>0.1</sub>-DRZ600</b>                  | 441                                                            | 0.29                                                                   | 0.24                                                              | n.d.                                                             |

234
